# Supplementary material for: The prescriptions from Shenghui soup enhanced neurite growth and GAP-43 expression level in PC12 cells
Source: Springer Nature journal article supplement (doi:10.1186/s12906-016-1339-y), 2016-09-19

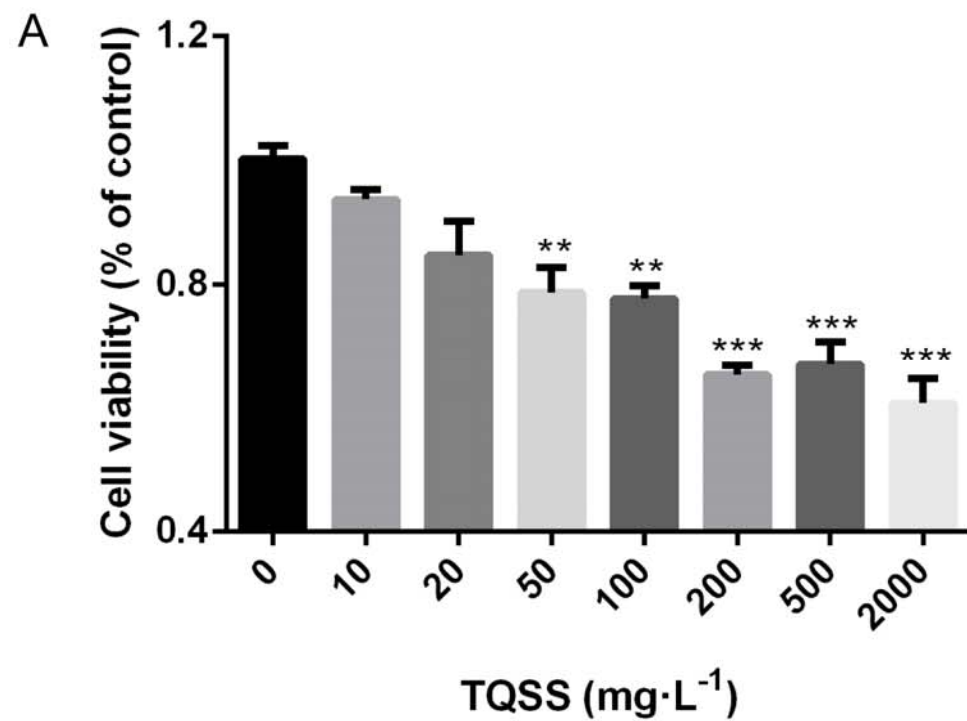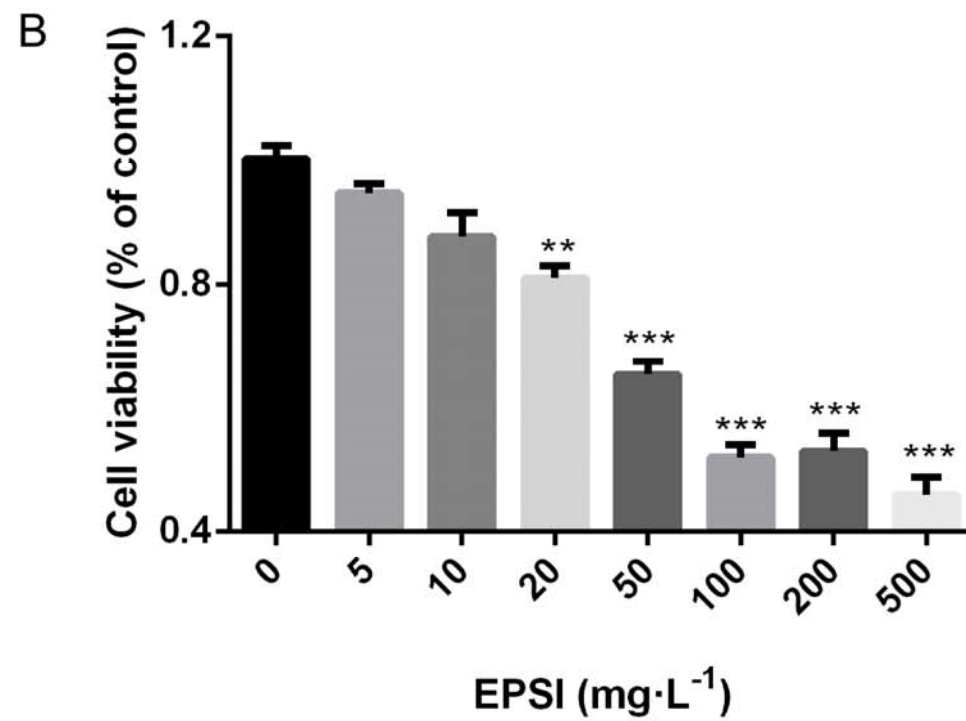

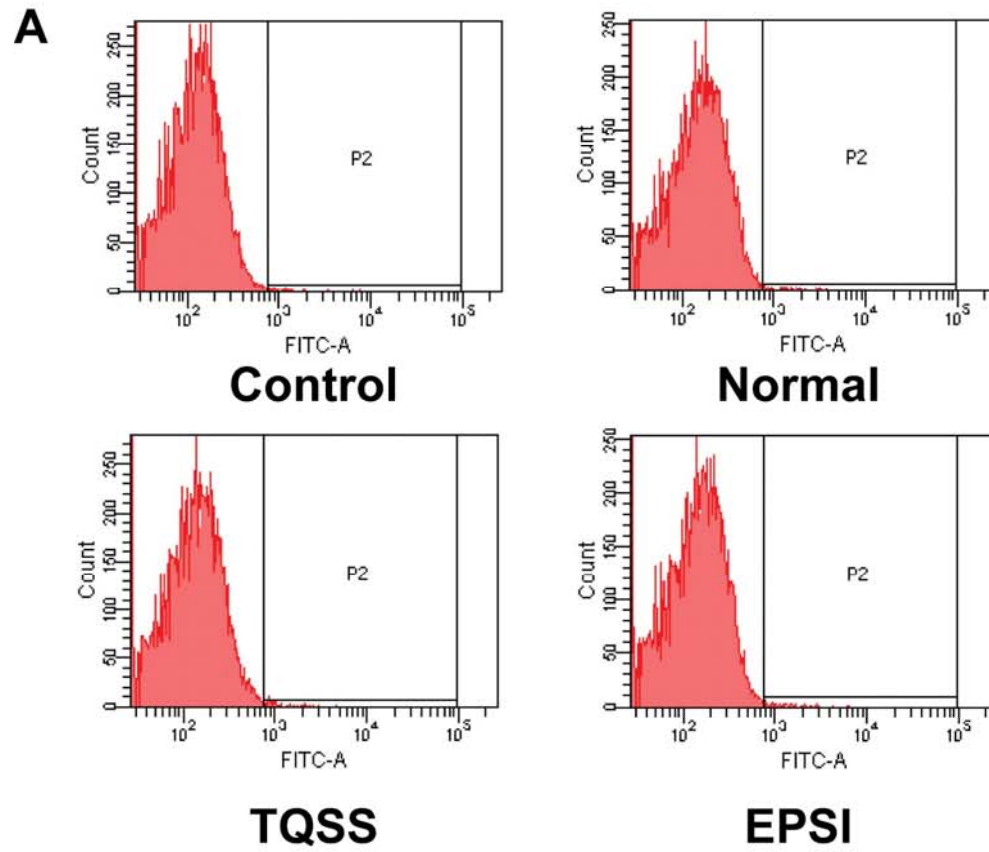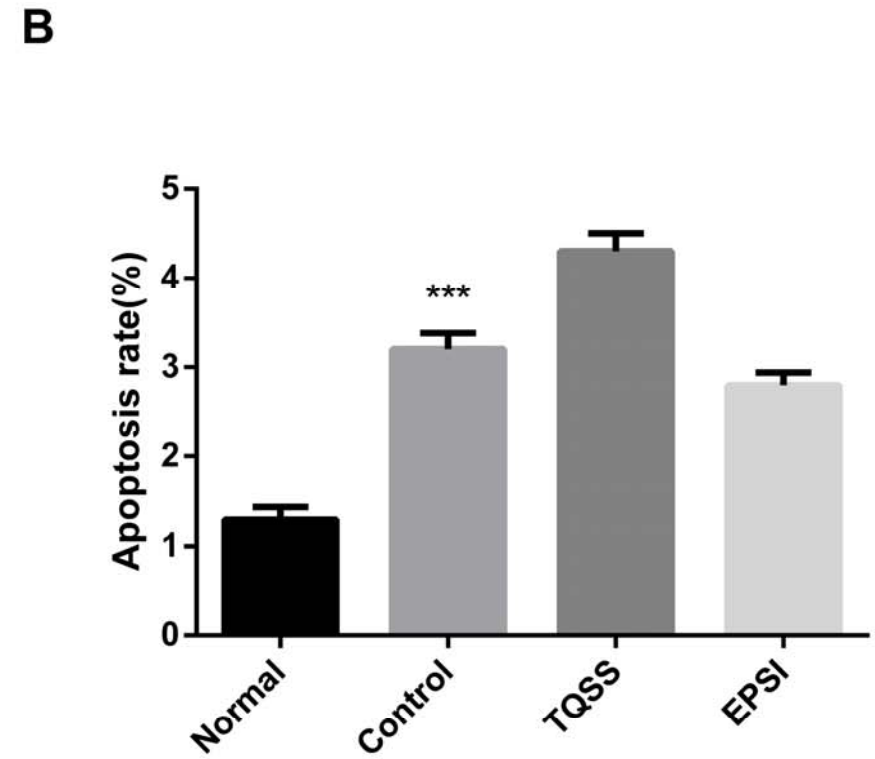

Supplement: MOESM1 [file 10720894]
